# Supplementary material
Source: PubMed Central journal article supplement (PMC6537320)
Supplement: DS_10.1177_1941738119827966.pdf [file DS_10.1177_1941738119827966.pdf]

| Event      | Date       | Place | Event        | Date       | Place |
|------------|------------|-------|------------|------------|-------|------------|------------|-------|------------|------------|-------|--------------|------------|-------|
| UFC 219    | 30/12/2017 | USA   | UFC FN 105 | 19/02/2017 | CAN   | UFC FN 87  | 08/05/2016 | NET   | UFC 188    | 13/06/2015 | MEX   | UFC 177      | 30/08/2014 | USA   |
| UFC Fox 26 | 19/12/2017 | CAN   | UFC 208    | 11/02/2017 | USA   | UFC 197    | 23/04/2016 | USA   | UFC FN 68  | 06/06/2015 | USA   | UFC FN 49    | 23/08/2014 | USA   |
| UFC FN 123 | 09/12/2017 | USA   | UFC FN 104 | 04/02/2017 | USA   | UFC Fox 19 | 16/04/2016 | USA   | UFC FN 67  | 30/05/2015 | BRA   | UFC FN 48    | 23/08/2014 | CHI   |
| UFC 218    | 02/12/2017 | USA   | UFC Fox 23 | 28/01/2017 | USA   | UFC FN 86  | 10/04/2016 | CRO   | UFC 187    | 23/05/2015 | USA   | UFC FN 47    | 16/08/2014 | USA   |
| TUF 26     | 01/12/2017 | USA   | UFC FN 103 | 15/01/2017 | USA   | UFC FN 85  | 19/03/2016 | AUS   | UFC FN 66  | 16/05/2015 | PHI   | UFC Fox 12   | 26/07/2014 | USA   |
| UFC FN 122 | 25/11/2017 | CHI   | UFC 207    | 30/12/2016 | USA   | UFC 196    | 05/03/2016 | USA   | UFC FN 65  | 10/05/2015 | AUS   | UFC FN 46    | 19/07/2014 | IRL   |
| UFC FN 121 | 18/11/2017 | AUS   | UFC Fox 22 | 17/12/2016 | USA   | UFC FN 84  | 27/02/2016 | ENG   | UFC 186    | 25/04/2015 | CAN   | UFC FN 45    | 16/07/2014 | USA   |
| UFC FN 120 | 11/11/2017 | USA   | UFC 206    | 10/12/2016 | CAN   | UFC FN 83  | 21/02/2016 | USA   | UFC Fox 15 | 18/04/2015 | USA   | TUF 19       | 06/07/2014 | USA   |
| UFC 217    | 04/11/2017 | USA   | UFC FN 102 | 09/12/2016 | USA   | UFC FN 82  | 06/02/2016 | USA   | UFC FN 64  | 11/04/2015 | POL   | UFC 175      | 05/07/2014 | USA   |
| UFC FN 119 | 28/10/2017 | BRA   | TUF 24     | 03/12/2016 | USA   | UFC Fox 18 | 30/01/2016 | USA   | UFC FN 63  | 04/04/2015 | USA   | UFC FN 44    | 28/06/2014 | USA   |
| UFC FN 118 | 21/10/2017 | POL   | UFC FN 101 | 26/11/2016 | NZE   | UFC FN 81  | 17/01/2016 | USA   | UFC FN 62  | 21/03/2015 | BRA   | UFC FN 43    | 28/06/2014 | NZE   |
| UFC 216    | 07/10/2017 | USA   | UFC FN 100 | 19/11/2016 | BRA   | UFC 195    | 02/01/2016 | USA   | UFC 185    | 14/03/2015 | USA   | UFC 174      | 14/06/2014 | CAN   |
| UFC FN 117 | 22/09/2017 | JAP   | UFC FN 99  | 19/11/2016 | IRL   | UFC Fox 17 | 19/12/2015 | USA   | UFC 184    | 28/02/2015 | USA   | UFC FN 42    | 07/06/2014 | USA   |
| UFC FN 116 | 16/09/2017 | USA   | UFC 205    | 12/11/2016 | USA   | UFC 194    | 12/12/2015 | USA   | UFC FN 61  | 22/02/2015 | BRA   | UFC FN 41    | 31/05/2014 | GER   |
| UFC 215    | 09/09/2017 | CAN   | UFC FN 98  | 05/11/2016 | MEX   | TUF 22     | 11/12/2015 | USA   | UFC FN 60  | 14/02/2015 | USA   | TUF Brazil 3 | 31/05/2014 | BRA   |
| UFC FN 115 | 02/09/2017 | NET   | UFC 204    | 08/10/2016 | ENG   | UFC FN 80  | 10/12/2015 | USA   | UFC 183    | 31/01/2015 | USA   | UFC 173      | 24/05/2014 | USA   |
| UFC FN 114 | 05/08/2017 | MEX   | UFC FN 96  | 01/10/2016 | USA   | UFC FN 79  | 28/11/2015 | COR   | UFC Fox 14 | 24/01/2015 | SUE   | UFC FN 40    | 10/05/2014 | USA   |
| UFC 214    | 29/07/2017 | USA   | UFC FN 95  | 24/09/2016 | BRA   | UFC FN 78  | 21/11/2015 | MEX   | UFC FN 59  | 18/01/2015 | USA   | UFC 172      | 26/04/2014 | USA   |
| UFC Fox 25 | 22/07/2017 | USA   | UFC FN 94  | 17/09/2016 | USA   | UFC 193    | 14/11/2015 | AUS   | UFC 182    | 03/01/2015 | USA   | UFC Fox 11   | 19/04/2014 | USA   |
| UFC FN 113 | 16/07/2017 | SCO   | UFC 203    | 10/09/2016 | USA   | UFC FN 77  | 07/11/2015 | BRA   | UFC FN 58  | 30/12/2014 | BRA   | TUF Nations  | 16/04/2014 | CAN   |
| UFC 213    | 08/07/2017 | USA   | UFC FN 93  | 03/09/2016 | GER   | UFC FN 76  | 24/10/2015 | IRL   | UFC Fox 13 | 13/12/2014 | USA   | UFC FN 39    | 11/04/2014 | UAE   |
| TUF 25     | 07/07/2017 | USA   | UFC Fox 21 | 27/08/2016 | CAN   | UFC 192    | 03/10/2015 | USA   | TUF 20     | 12/12/2014 | USA   | UFC FN 38    | 23/03/2014 | BRA   |
| UFC FN 112 | 25/06/2017 | USA   | UFC 202    | 20/08/2016 | USA   | UFC FN 75  | 26/09/2015 | JAP   | UFC 181    | 06/12/2014 | USA   | UFC 171      | 15/03/2014 | USA   |
| UFC FN 111 | 17/06/2017 | SIN   | UFC FN 92  | 06/08/2016 | USA   | UFC 191    | 05/09/2015 | USA   | UFC FN 57  | 22/11/2014 | USA   | UFC FN 37    | 08/03/2014 | ENG   |
| UFC FN 110 | 10/06/2017 | NZE   | UFC 201    | 30/07/2016 | USA   | UFC FN 74  | 23/08/2015 | CAN   | UFC 180    | 15/11/2014 | MEX   | TUF China    | 01/03/2014 | CHI   |
| UFC 212    | 03/06/2017 | BRA   | UFC Fox 20 | 23/07/2016 | USA   | UFC FN 73  | 08/08/2015 | USA   | UFC FN 56  | 08/11/2014 | BRA   | UFC 170      | 22/02/2014 | USA   |
| UFC FN 109 | 28/05/2017 | SWE   | UFC FN 91  | 13/07/2016 | USA   | UFC 190    | 01/08/2015 | BRA   | UFC FN 55  | 07/11/2014 | AUS   | UFC FN 36    | 15/02/2014 | BRA   |
| UFC 211    | 13/05/2017 | USA   | UFC 200    | 09/07/2016 | USA   | UFC Fox 16 | 25/07/2015 | USA   | UFC 179    | 25/10/2014 | BRA   | UFC 169      | 01/02/2014 | USA   |
| UFC FN 108 | 22/04/2017 | USA   | TUF 23     | 08/07/2016 | USA   | UFC FN 72  | 18/07/2015 | SCO   | UFC FN 54  | 04/10/2014 | CAN   | UFC Fox 10   | 25/01/2014 | USA   |
| UFC Fox 24 | 15/04/2017 | USA   | UFC FN 90  | 07/07/2016 | USA   | UFC FN 71  | 15/07/2015 | USA   | UFC FN 53  | 04/10/2014 | SWE   | UFC FN 35    | 15/01/2014 | USA   |
| UFC 210    | 08/04/2017 | USA   | UFC FN 89  | 18/06/2016 | CAN   | TUF 21     | 12/07/2015 | USA   | UFC 178    | 27/09/2014 | USA   | UFC FN 34    | 04/01/2014 | SIN   |
| UFC FN 107 | 18/03/2017 | ENG   | UFC 199    | 04/06/2016 | USA   | UFC 189    | 11/07/2015 | USA   | UFC FN 52  | 20/09/2014 | JAP   |              |            |       |
| UFC FN 106 | 11/03/2017 | BRA   | UFC FN 88  | 29/05/2016 | USA   | UFC FN 70  | 27/06/2015 | USA   | UFC FN 51  | 13/09/2014 | BRA   |              |            |       |
| UFC 209    | 04/03/2017 | USA   | UFC 198    | 14/05/2016 | BRA   | UFC FN 69  | 20/06/2015 | GER   | UFC FN 50  | 05/09/2014 | USA   |              |            |       |

AUS: Australia  
BRA: Brazil  
CAN: Canada  
CHI: China  
CRO: Croatia

ENG: England  
GER: Germany  
IRL: Ireland  
JAP: Japan  
MEX: Mexico

NET: Netherlands  
NZE: New Zealand  
PHI: Philippines  
POL: Poland  
SCO: Scotland

SIN: Singapore  
SKO: South Korea  
SWE: Sweden  
UAE: United Arab  
Emirates

USA: United States of  
America  
UFC: Ultimate Fighting  
Championship  
UFC FN: UFC Fight Night

UFC Fox: UFC on Fox  
TUF: The Ultimate  
Fighter Finale
